# Supplementary material
Source: PubMed Central journal article supplement (PMC3402192)

## Supplemental Figure Legends

Supplemental Figure 1. Haplotype cluster analysis ( $K = 3$ ) of *Arabidopsis thaliana* lines from North America and Eurasia conducted without geographic origin information for lines. Data generated from Structure analysis on 228 EA lines and 180 NA lines genotyped at 136 genome-wide SNP loci. See text for details.

Supplemental Figure 2. Haplotype cluster analysis ( $K = 5$ ) of *Arabidopsis thaliana* lines from North America clustered into ancestral populations based on Eurasian haplotypes. Data generated from Structure analysis on 228 EA lines and 180 NA lines genotyped at 136 genome-wide SNP loci. See text for details.

Supplemental Figure 3. Changes in allele frequency between the native and introduced range for 136 SNPs. On the horizontal axis, the minor allele frequency is plotted, excluding singletons. The vertical axis depicts the corresponding allele frequencies in the introduced range. The diagonal line depicts the 1:1 relationship (no change in frequency), while the horizontal line is provided as a reference to distinguish alleles that changed from minor alleles to major alleles (above the line), or remained minor alleles (below the line). *FRI*, *FLC*, and *PHYC* are shown for reference.

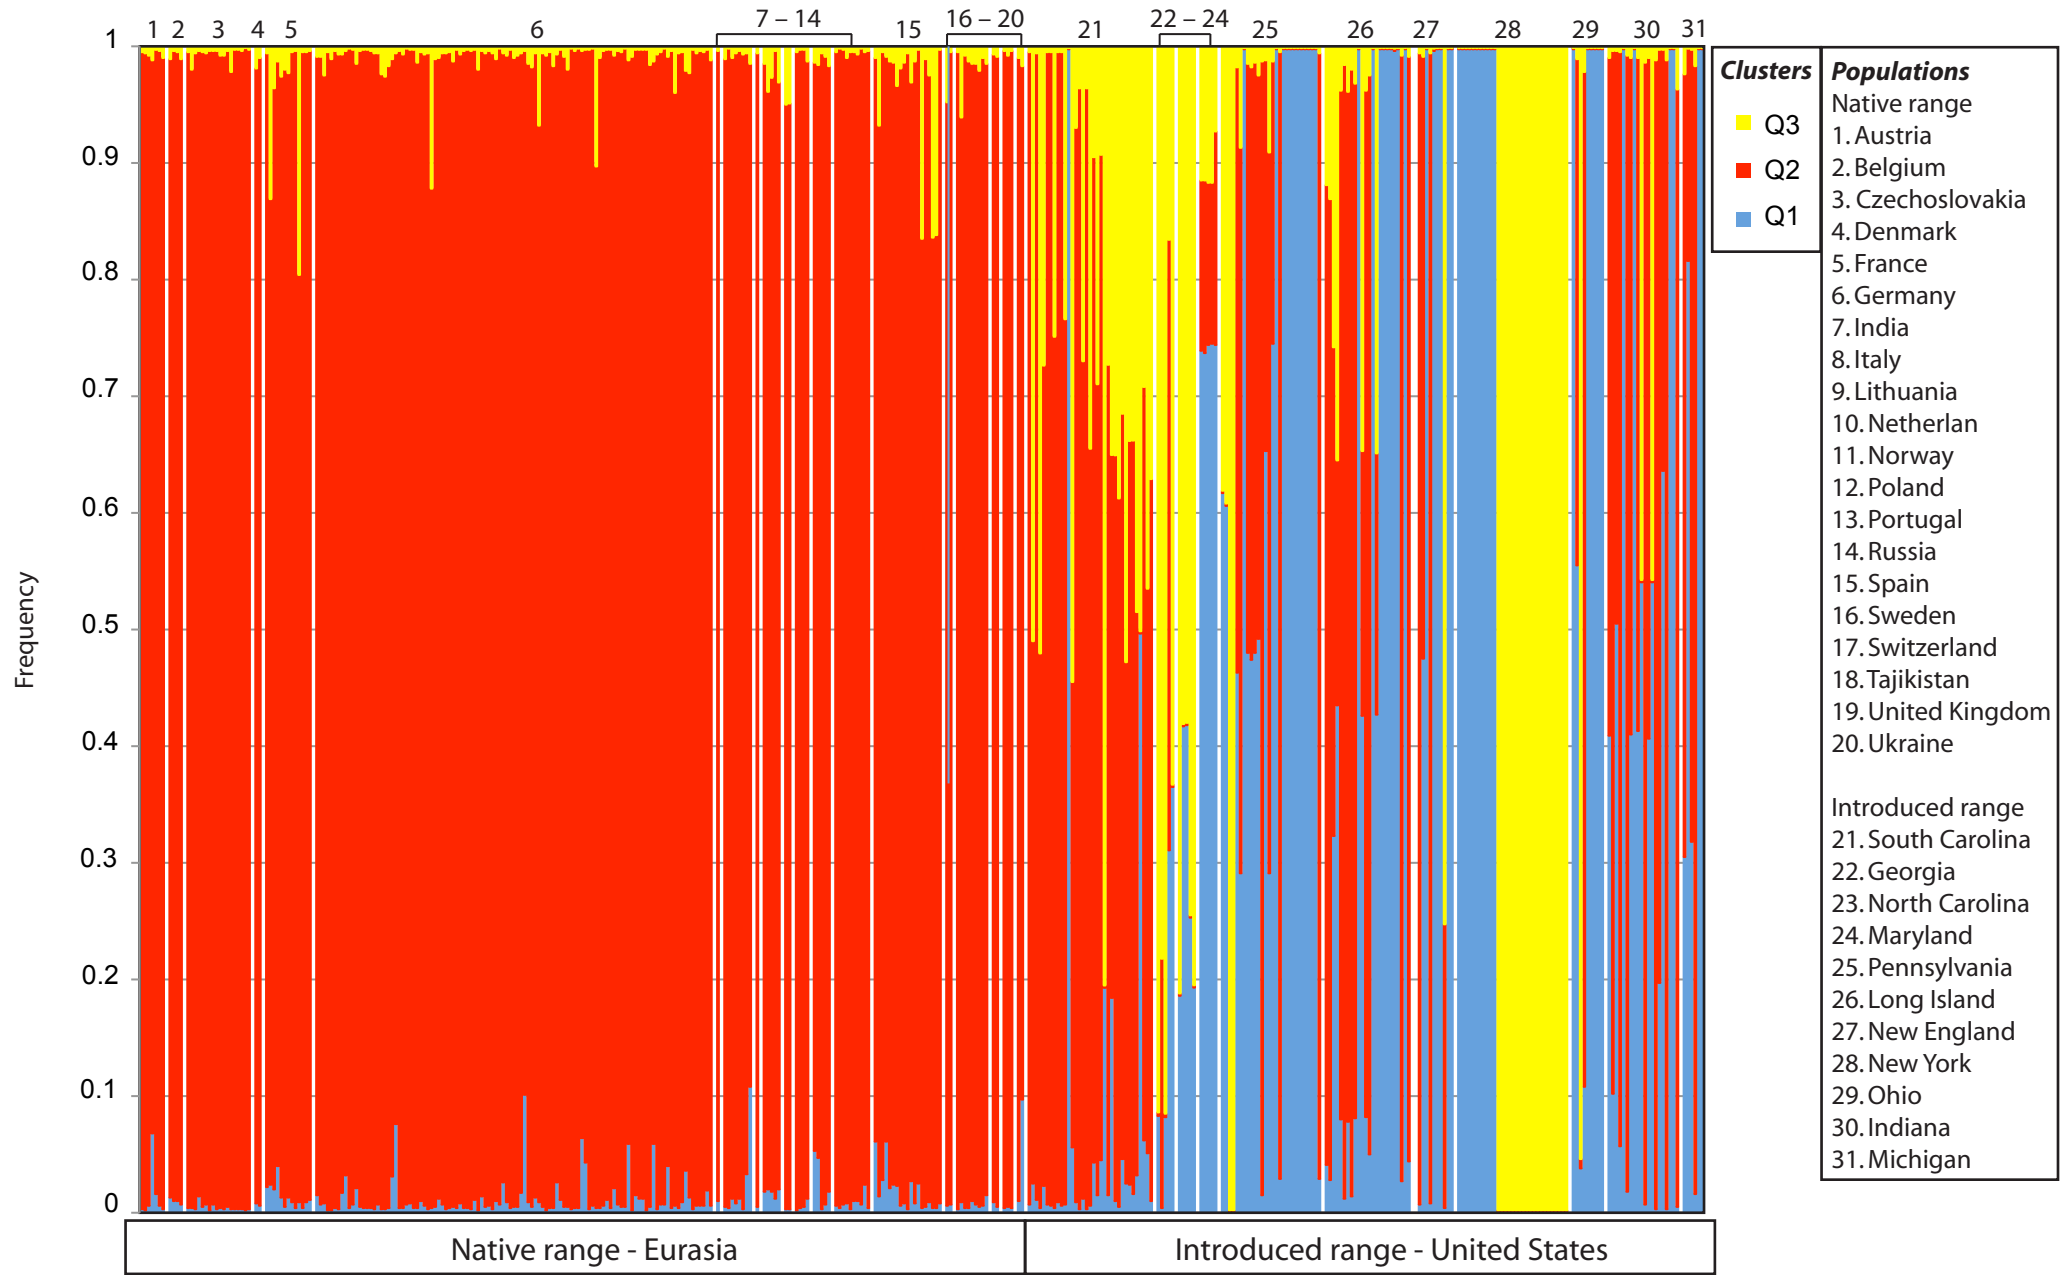

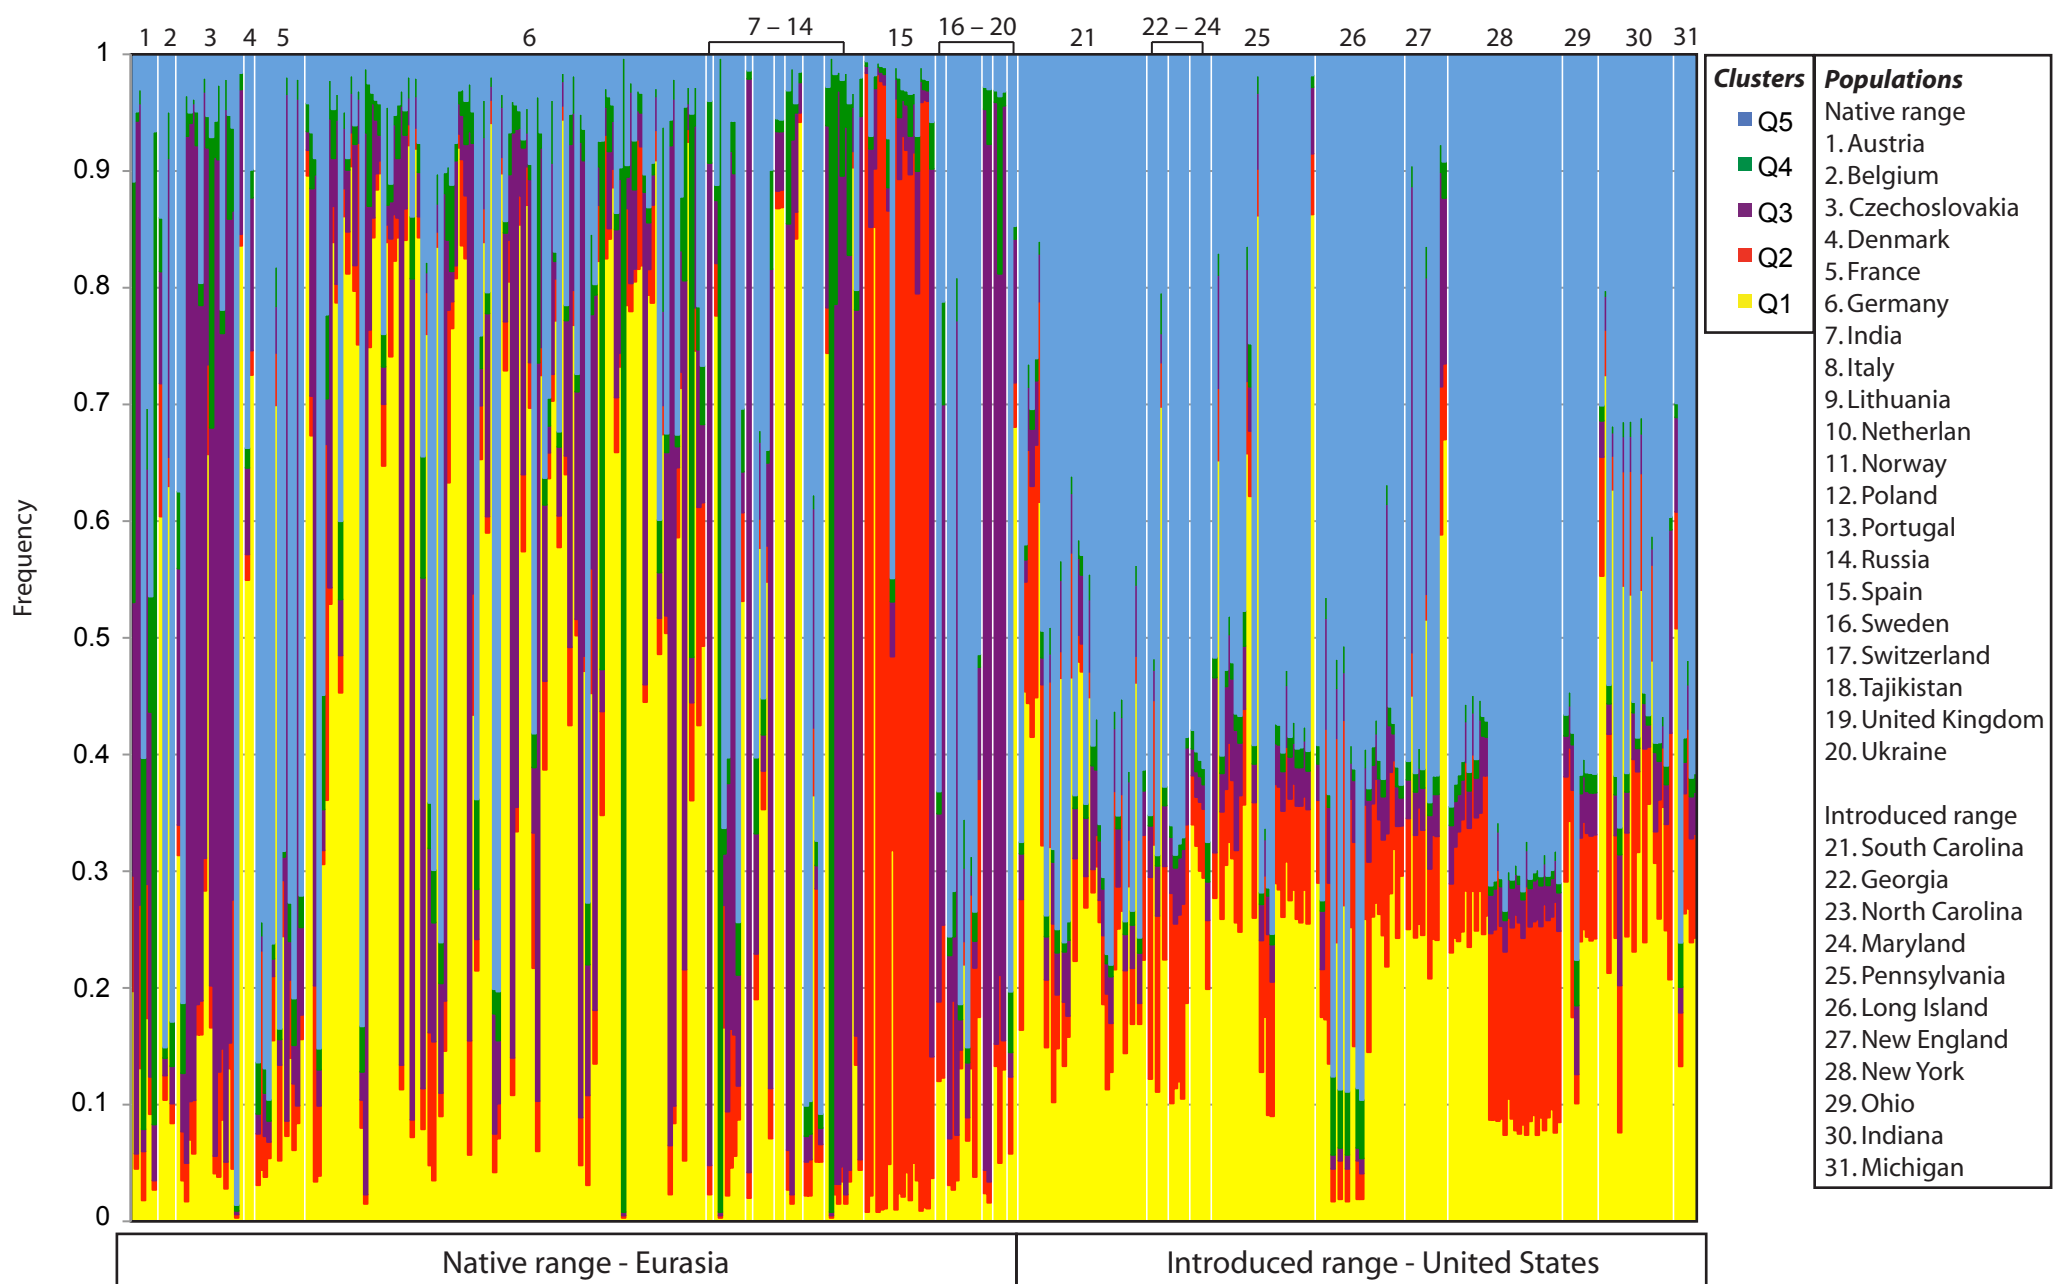

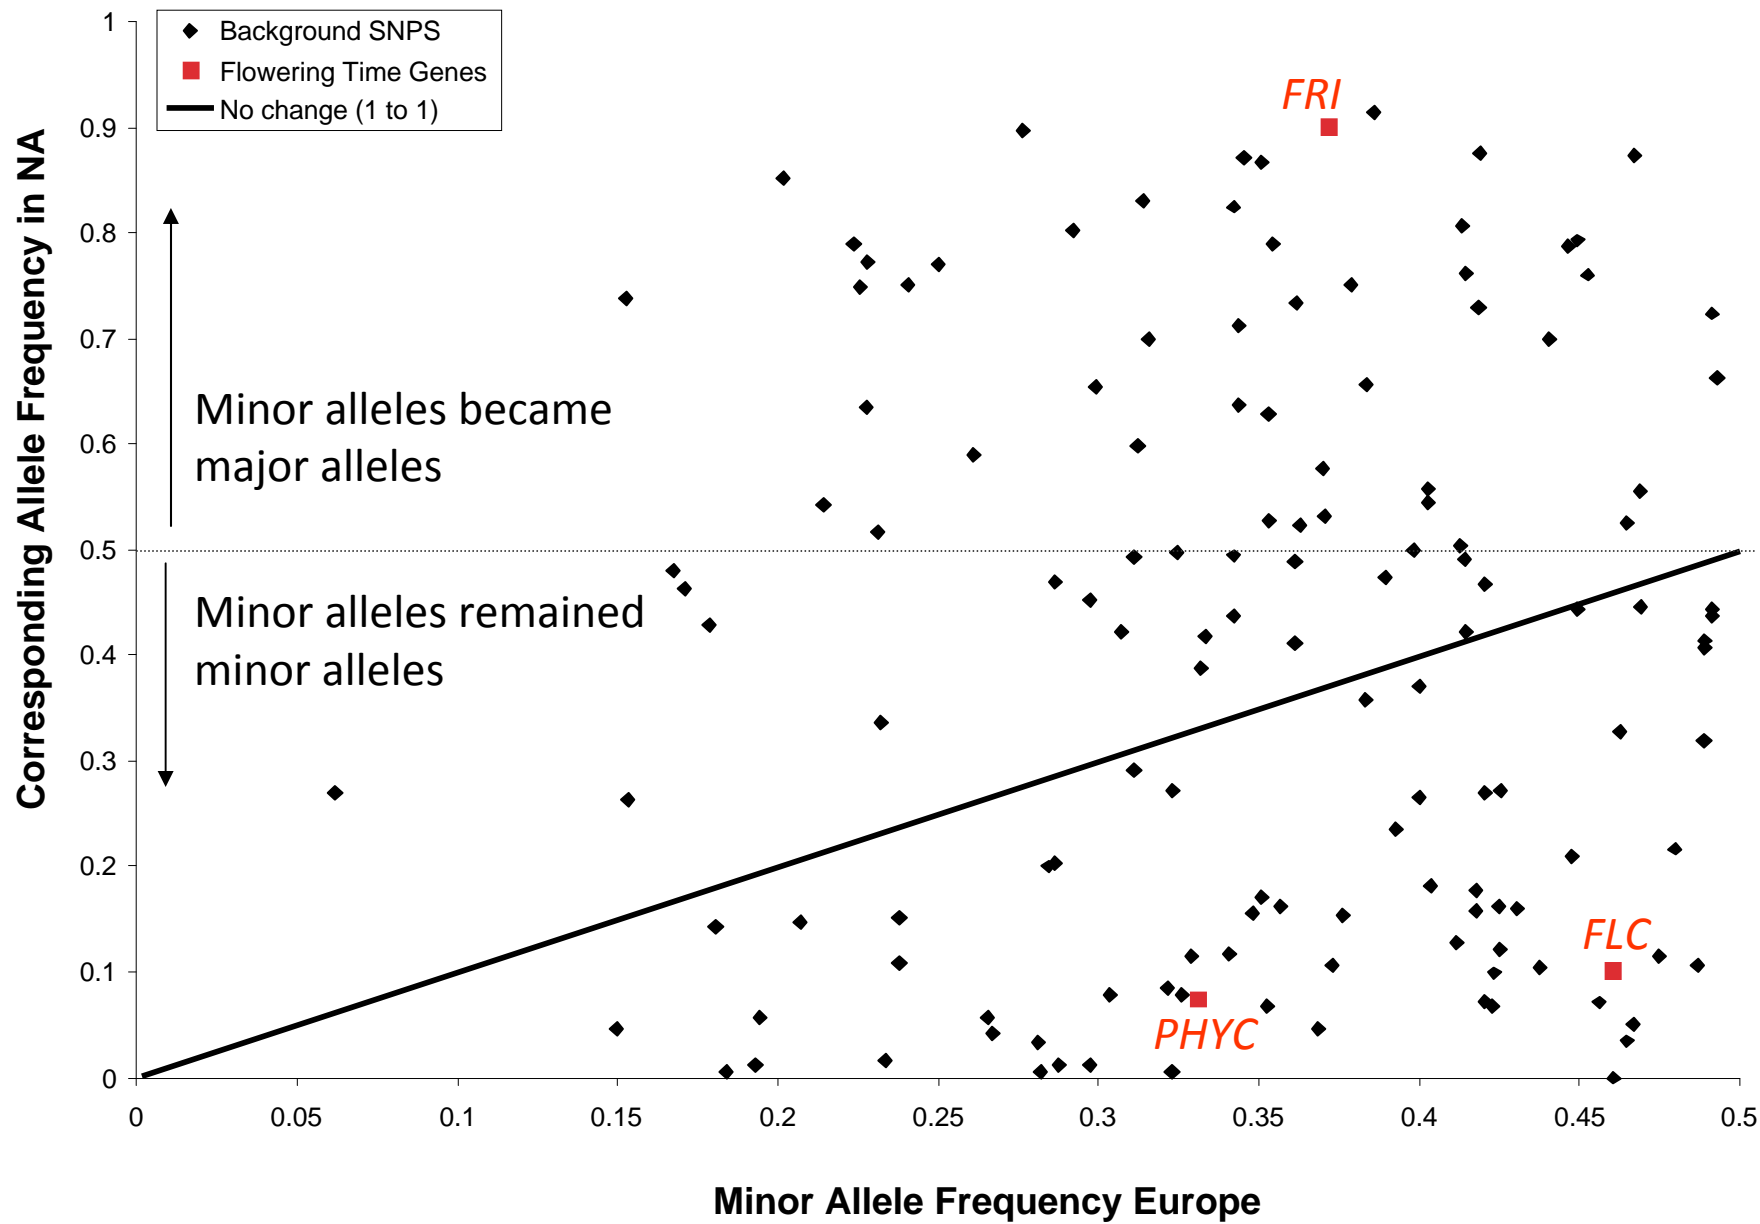

Supplement: ece30002-1162-SD1.pdf [file ece30002-1162-SD1.pdf]
