# Supplementary material
Source: PubMed Central journal article supplement (PMC3402192)
Supplement: ece30002-1162-SD2.pdf [file ece30002-1162-SD2.pdf]

Supplemental Table 1. Origins and genotypes of *Arabidopsis thaliana* lines used in the genotyping experiment. Lines not also used in the common garden experiment have a zero in the column “In garden.”.

| Continent | Population2    | Stock Number | In Garden | Latitude (°N) | Longitude (°W) | FRI  | FLC | PhyC | 3 loci | Source           |
|-----------|----------------|--------------|-----------|---------------|----------------|------|-----|------|--------|------------------|
| NA        | CHA-CON-FOR    | CHA18        | 0         | 42.37         | -71.15         | Wt   | A   | Ler  | 1      | Donohue/Borevitz |
| NA        | CHA-CON-FOR    | CHA8         | 1         | 42.37         | -71.15         | Wt   | A   | Ler  | 1      | Donohue/Borevitz |
| NA        | CHA-CON-FOR    | CON1         | 1         | 42.37         | -71.15         | null | A   | Ler  | 1      | Donohue/Borevitz |
| NA        | Harvard Square | CS22351      | 1         | 42.37         | -71.11         | Wt   | A   | Ler  | 1      | ABRC             |
| NA        | Harvard Square | CS22353      | 1         | 42.37         | -71.11         | Wt   | A   | Ler  | 1      | ABRC             |
| NA        | Harvard Square | CS22354      | 1         | 42.37         | -71.11         | Wt   | A   | Ler  | 1      | ABRC             |
| NA        | Harvard Square | CS22355      | 1         | 42.37         | -71.11         | Wt   | A   | Ler  | 1      | ABRC             |
| NA        | Harvard Square | CS22356      | 1         | 42.37         | -71.11         | Wt   | A   | Ler  | 1      | ABRC             |
| NA        | Harvard Square | CS22359      | 1         | 42.37         | -71.11         | Wt   | A   | Ler  | 1      | ABRC             |
| NA        | FM-RP          | CS22362      | 1         | 42.44         | -76.50         | Wt   | A   | Ler  | 1      | ABRC             |
| NA        | FM-RP          | CS22363      | 1         | 42.44         | -76.50         | Wt   | A   | Ler  | 1      | ABRC             |
| NA        | FM-RP          | CS22364      | 1         | 42.44         | -76.50         | Wt   | A   | Ler  | 1      | ABRC             |
| NA        | FM-RP          | CS22365      | 1         | 42.44         | -76.50         | Wt   | A   | Ler  | 1      | ABRC             |
| NA        | FM-RP          | CS22366      | 1         | 42.44         | -76.50         | Wt   | A   | Ler  | 1      | ABRC             |
| NA        | FM-RP          | CS22367      | 1         | 42.44         | -76.50         | Wt   | A   | Ler  | 1      | ABRC             |
| NA        | FM-RP          | CS22368      | 1         | 42.44         | -76.50         | Wt   | A   | Ler  | 1      | ABRC             |
| NA        | FM-RP          | CS22369      | 1         | 42.44         | -76.50         | Wt   | A   | Ler  | 1      | ABRC             |
| NA        | FM-RP          | CS22370      | 1         | 42.44         | -76.50         | Wt   | A   | Ler  | 1      | ABRC             |
| NA        | FM-RP          | CS22370      | 1         | 42.44         | -76.50         | Wt   | A   | Ler  | 1      | ABRC             |
| NA        | FM-RP          | CS22371      | 1         | 42.44         | -76.50         | Wt   | A   | Ler  | 1      | ABRC             |
| NA        | FM-RP          | CS22372      | 1         | 42.44         | -76.50         | Wt   | A   | Ler  | 1      | ABRC             |
| NA        | FM-RP          | CS22375      | 1         | 42.44         | -76.50         | Wt   | A   | Ler  | 1      | ABRC             |
| NA        | FM-RP          | CS22376      | 1         | 42.44         | -76.50         | Wt   | A   | Ler  | 1      | ABRC             |
| NA        | FM-RP          | CS22377      | 1         | 42.44         | -76.50         | Wt   | A   | Ler  | 1      | ABRC             |

|    |                        |         |   |       |        |      |   |     |   |      |
|----|------------------------|---------|---|-------|--------|------|---|-----|---|------|
| NA | FM-RP                  | CS22378 | 1 | 42.44 | -76.50 | Wt   | A | Ler | 1 | ABRC |
| NA | FM-RP                  | CS22379 | 1 | 42.44 | -76.50 | Wt   | A | Ler | 1 | ABRC |
| NA | FM-RP                  | CS22380 | 1 | 42.44 | -76.50 | Wt   | A | Ler | 1 | ABRC |
| NA | FM-RP                  | CS22381 | 1 | 42.44 | -76.50 | Wt   | A | Ler | 1 | ABRC |
| NA | FM-RP                  | CS22382 | 1 | 42.44 | -76.50 | Wt   | A | Ler | 1 | ABRC |
| NA | FM-RP                  | CS22383 | 1 | 42.44 | -76.50 | Wt   | A | Ler | 1 | ABRC |
| NA | FM-RP                  | CS22385 | 1 | 42.44 | -76.50 | Wt   | A | Ler | 1 | ABRC |
| NA | FM-RP                  | CS22389 | 1 | 42.44 | -76.50 | Wt   | A | Ler | 1 | ABRC |
| NA | FM-RP                  | CS22390 | 1 | 42.44 | -76.50 | Wt   | A | Ler | 1 | ABRC |
| NA | FM-RP                  | CS22391 | 1 | 42.44 | -76.50 | Wt   | A | Ler | 1 | ABRC |
| NA | FM-RP                  | CS22392 | 1 | 42.44 | -76.50 | Wt   | A | Ler | 1 | ABRC |
| NA | FM-RP                  | CS22394 | 1 | 42.44 | -76.50 | Wt   | A | Ler | 1 | ABRC |
| NA | FM-RP                  | CS22395 | 1 | 42.44 | -76.50 | Wt   | A | Ler | 1 | ABRC |
| NA | FM-RP                  | CS22396 | 1 | 42.44 | -76.50 | Wt   | A | Ler | 1 | ABRC |
| NA | FM-RP                  | CS22398 | 1 | 42.44 | -76.50 | Wt   | A | Ler | 1 | ABRC |
| NA | FM-RP                  | CS22399 | 1 | 42.44 | -76.50 | Wt   | A | Ler | 1 | ABRC |
| NA | FM-RP                  | CS22400 | 1 | 42.44 | -76.50 | Wt   | A | Ler | 1 | ABRC |
| NA | Knox                   | CS22401 | 1 | 41.30 | -86.62 | Wt   | A | Ler | 1 | ABRC |
| NA | Knox                   | CS22402 | 1 | 41.30 | -86.62 | Wt   | A | Ler | 1 | ABRC |
| NA | Knox                   | CS22403 | 1 | 41.30 | -86.62 | Wt   | A | Ler | 1 | ABRC |
| NA | Knox                   | CS22404 | 1 | 41.30 | -86.62 | Wt   | A | Ler | 1 | ABRC |
| NA | Knox                   | CS22405 | 1 | 41.30 | -86.62 | Wt   | A | Ler | 1 | ABRC |
| NA | Knox                   | CS22407 | 1 | 41.30 | -86.62 | Wt   | A | Ler | 1 | ABRC |
| NA | Knox                   | CS22408 | 1 | 41.30 | -86.62 | Wt   | A | Ler | 1 | ABRC |
| NA | Knox                   | CS22409 | 1 | 41.30 | -86.62 | Wt   | A | Ler | 1 | ABRC |
| NA | Knox                   | CS22410 | 1 | 41.30 | -86.62 | Wt   | A | Ler | 1 | ABRC |
| NA | Knox                   | CS22411 | 1 | 41.30 | -86.62 | null | A | Ler | 1 | ABRC |
| NA | Knox                   | CS22412 | 1 | 41.30 | -86.62 | null | A | Ler | 1 | ABRC |
| NA | Knox                   | CS22413 | 1 | 41.30 | -86.62 | null | A | Col | 1 | ABRC |
| NA | Knox                   | CS22414 | 1 | 41.30 | -86.62 | Wt   | A | Ler | 1 | ABRC |
| NA | Knox                   | CS22415 | 1 | 41.30 | -86.62 | Wt   | A | Ler | 1 | ABRC |
| NA | Knox                   | CS22416 | 1 | 41.30 | -86.62 | Wt   | A | Ler | 1 | ABRC |
| NA | Knox                   | CS22417 | 1 | 41.30 | -86.62 | Wt   | A | Ler | 1 | ABRC |
| NA | Knox                   | CS22418 | 1 | 41.30 | -86.62 | Wt   | A | Ler | 1 | ABRC |
| NA | Cold Spring Harbor Lab | CS22419 | 1 | 40.87 | -73.46 |      |   |     | 0 | ABRC |
| NA | Cold Spring            | CS22420 | 1 | 40.87 | -73.46 | Wt   | B | Ler | 1 | ABRC |

|    |                        |         |   |       |        |      |   |     |   |      |
|----|------------------------|---------|---|-------|--------|------|---|-----|---|------|
|    | Harbor Lab             |         |   |       |        |      |   |     |   |      |
| NA | Cold Spring Harbor Lab | CS22421 | 1 | 40.87 | -73.46 | Wt   | A | Ler | 1 | ABRC |
| NA | Cold Spring Harbor Lab | CS22422 | 1 | 40.87 | -73.46 | Wt   | B | Ler | 1 | ABRC |
| NA | Cold Spring Harbor Lab | CS22423 | 1 | 40.87 | -73.46 | Wt   | B | Ler | 1 | ABRC |
| NA | Cold Spring Harbor Lab | CS22424 | 1 | 40.87 | -73.46 | Wt   | A | Ler | 1 | ABRC |
| NA | Cold Spring Harbor Lab | CS22425 | 1 | 40.87 | -73.46 | Wt   | A | Ler | 1 | ABRC |
| NA | Cold Spring Harbor Lab | CS22426 | 1 | 40.87 | -73.46 | Wt   | A | Ler | 1 | ABRC |
| NA | Cold Spring Harbor Lab | CS22428 | 1 | 40.87 | -73.46 | Wt   | A | Ler | 1 | ABRC |
| NA | Cold Spring Harbor Lab | CS22429 | 1 | 40.87 | -73.46 | Wt   | A | Ler | 1 | ABRC |
| NA | Cold Spring Harbor Lab | CS22430 | 1 | 40.87 | -73.46 | Wt   | A | Ler | 1 | ABRC |
| NA | Cold Spring Harbor Lab | CS22431 | 1 | 40.87 | -73.46 | Wt   | B | Ler | 1 | ABRC |
| NA | Cold Spring Harbor Lab | CS22432 | 1 | 40.87 | -73.46 |      |   |     | 0 | ABRC |
| NA | Cold Spring Harbor Lab | CS22434 | 1 | 40.87 | -73.46 | Wt   | A | Ler | 1 | ABRC |
| NA | RRS                    | CS22564 | 1 | 41.53 | -86.43 | null | A | Ler | 1 | ABRC |
| NA | RRS                    | CS22565 | 1 | 41.53 | -86.43 | Wt   | A | Ler | 1 | ABRC |
| NA | Knox                   | CS22566 | 1 | 41.30 | -86.62 | Wt   | A | Ler | 1 | ABRC |
| NA | Rmx                    | CS22568 | 1 | 42.10 | -86.49 | Wt   | A | Ler | 1 | ABRC |
| NA | Rmx                    | CS22569 | 1 | 42.10 | -86.49 | Wt   | B | Ler | 1 | ABRC |
| NA | Pna                    | CS22570 | 1 | 42.12 | -86.46 | Wt   | B | Ler | 1 | ABRC |
| NA | Greenville             | CS6729  | 1 | 43.18 | -85.25 | Wt   | A | Ler | 1 | ABRC |
| NA | Kindalville            | CS6755  | 1 | 42.50 | -84.50 | Wt   | A | Ler | 1 | ABRC |
| NA | Tul                    | CS6877  | 1 | 43.27 | -85.26 | Wt   | A | Ler | 1 | ABRC |
| NA | Martha's Vineyard      | CS6914  | 1 | 41.39 | -70.67 | Wt   | A | Ler | 1 | ABRC |
| NA | Tol                    | CS8020  | 1 | 41.65 | -83.54 | Wt   | A | Ler | 1 | ABRC |
| NA | Tol                    | CS8021  | 1 | 41.65 | -83.54 | Wt   | A | Ler | 1 | ABRC |

|    |             |           |   |       |        |      |   |     |   |                  |
|----|-------------|-----------|---|-------|--------|------|---|-----|---|------------------|
| NA | Tol         | CS8023    | 1 | 41.65 | -83.54 | Wt   | A | Ler | 1 | ABRC             |
| NA | Tol         | CS8024    | 1 | 41.65 | -83.54 | Wt   | A | Ler | 1 | ABRC             |
| NA | Tol         | CS8025    | 1 | 41.65 | -83.54 | Wt   | A | Ler | 1 | ABRC             |
| NA | Tol         | CS8026    | 1 | 41.65 | -83.54 | Wt   | A | Ler | 1 | ABRC             |
| NA | Tol         | CS8027    | 1 | 41.65 | -83.54 | Wt   | A | Ler | 1 | ABRC             |
| NA | Tol         | CS8028    | 1 | 41.65 | -83.54 | Wt   | A | Ler | 1 | ABRC             |
| NA | Tol         | CS8029    | 1 | 41.65 | -83.54 | Wt   | A | Ler | 1 | ABRC             |
| NA | Limeport    | CS8070    | 1 | 40.56 | -75.40 | Wt   | A | Col | 1 | ABRC             |
| NA | ENF         | CS8141    | 0 | 41.76 | -72.67 |      | A |     | 0 | ABRC             |
| NA | KEN         | CS8142    | 1 | 41.76 | -72.67 |      |   |     | 0 | ABRC             |
| NA | WAR         | CS8143    | 1 | 41.90 | -71.43 | null | B | Ler | 1 | ABRC             |
| NA | LIN         | CS8144    | 1 | 41.73 | -71.28 | null | B | Ler | 1 | ABRC             |
| NA | CHA-CON-FOR | FOR11     | 1 | 42.37 | -71.15 | Wt   | A | Ler | 1 | Donohue/Borevitz |
| NA | CHA-CON-FOR | FOR3      | 1 | 42.37 | -71.15 | Wt   | A | Ler | 1 | Donohue/Borevitz |
| NA | GA:O        | GA:O-26-2 | 1 | 33.87 | -83.55 | Wt   | A | Ler | 1 | Malmberg         |
| NA | GA:O        | GA:O-39-2 | 1 | 33.87 | -83.55 | Wt   | A | Ler | 1 | Malmberg         |
| NA | GA:O        | GA:O-5-2  | 1 | 33.87 | -83.55 | Wt   | A | Ler | 1 | Malmberg         |
| NA | GA:O        | GA:O-7-2  | 1 | 33.87 | -83.55 | Wt   | A | Ler | 1 | Malmberg         |
| NA | GA:O        | GA:O-80-2 | 1 | 33.87 | -83.55 | Wt   | A | Ler | 1 | Malmberg         |
| NA | KYA         | KYA1      | 0 | 38.02 | -84.52 | Wt   | A | Ler | 1 | Donohue/Borevitz |
| NA | KYA         | KYA11     | 0 | 38.02 | -84.52 | Wt   | A | Ler | 1 | Donohue/Borevitz |
| NA | KYB         | KYB10     | 0 | 37.90 | -84.42 | Wt   | A | Ler | 1 | Donohue/Borevitz |
| NA | KYB         | KYB18     | 0 | 37.90 | -84.42 | Wt   | A | Ler | 1 | Donohue/Borevitz |
| NA | KYC         | KYC19     | 0 | 37.92 | -84.47 | Wt   | A | Ler | 1 | Donohue/Borevitz |
| NA | KYC         | KYC25     | 0 | 37.92 | -84.47 | Wt   | A | Ler | 1 | Donohue/Borevitz |
| NA | KYD         | KYD17     | 0 | 37.98 | -84.53 | Wt   | A | Ler | 1 | Donohue/Borevitz |
| NA | KYD         | KYD8      | 0 | 37.98 | -84.53 | Wt   | A | Ler | 1 | Donohue/Borevitz |
| NA | KYE         | KYE14     | 0 | 38.13 | -84.50 | Wt   | A | Ler | 1 | Donohue/Borevitz |
| NA | KYE         | KYE2      | 0 | 38.13 | -84.50 | Wt   | A | Ler | 1 | Donohue/Borevitz |
| NA | KYF         | KYF17     | 0 | 38.08 | -84.47 | Wt   | A | Col | 1 | Donohue/Borevitz |
| NA | KYF         | KYF24     | 1 | 38.08 | -84.47 |      | B | Col | 0 | Donohue/Borevitz |
| NA | KYG         | KYG2      | 0 | 38.02 | -84.53 | Wt   | A | Col | 1 | Donohue/Borevitz |
| NA | KYG         | KYG24     | 0 | 38.02 | -84.53 | Wt   | A | Col | 1 | Donohue/Borevitz |

|    |       |           |   |       |        |      |   |     |   |                           |
|----|-------|-----------|---|-------|--------|------|---|-----|---|---------------------------|
| NA | WAR   | LIN F17   | 1 | 41.90 | -71.43 | null | B | Col | 1 | Donohue/Borevitz          |
| NA | WAR   | LIN F5    | 1 | 41.90 | -71.43 | null | B |     | 0 | Donohue/Borevitz          |
| NA | WAR   | LIN S11   | 1 | 41.90 | -71.43 | null | B | Col | 1 | Donohue/Borevitz          |
| NA | WAR   | LIN S14   | 1 | 41.90 | -71.43 | null | B | Col | 1 | Donohue/Borevitz          |
| NA | MAB   | MAB19     | 1 | 42.53 | -72.57 | null | B | Col | 1 | Donohue/Borevitz          |
| NA | MAB   | MAB33     | 1 | 42.53 | -72.57 | null | B | Ler | 1 | Donohue/Borevitz          |
| NA | MAS   | MAS12     | 1 | 42.53 | -72.68 | null | B | Ler | 1 | Donohue/Borevitz          |
| NA | MAS   | MAS29     | 1 | 42.53 | -72.68 | null | B | Ler | 1 | Donohue/Borevitz          |
| NA | MAB   | MAW10     | 1 | 42.53 | -72.57 | null | B | Col | 1 | Donohue/Borevitz          |
| NA | MAB   | MAW3      | 1 | 42.53 | -72.57 |      |   |     | 0 | Donohue/Borevitz          |
| NA | MD    | MD-1:1    | 1 | 39.03 | -76.80 | Wt   | A | Ler | 1 | Fenster                   |
| NA | MD    | MD-1:3    | 1 | 39.03 | -76.80 | Wt   | A | Ler | 1 | Fenster                   |
| NA | MD    | MD-1:4    | 1 | 39.03 | -76.80 | Wt   | A | Ler | 1 | Fenster                   |
| NA | MD    | MD-1:5    | 1 | 39.03 | -76.80 | Wt   | A | Ler | 1 | Fenster                   |
| NA | MD    | MD-1:6    | 1 | 39.03 | -76.80 | Wt   | A | Ler | 1 | Fenster                   |
| NA | MIA   | MIA1      | 0 | 41.80 | -86.67 | Wt   | A | Ler | 1 | Donohue/Borevitz          |
| NA | MIA   | MIA24     | 0 | 41.80 | -86.67 | Wt   | A | Ler | 1 | Donohue/Borevitz          |
| NA | MIC   | MIC27     | 0 | 41.83 | -86.43 | Wt   | A | Ler | 1 | Donohue/Borevitz          |
| NA | MIC   | MIC34     | 0 | 41.83 | -86.43 | Wt   | A | Ler | 1 | Donohue/Borevitz          |
| NA | NC:1  | NC-1:14-1 | 0 | 36.02 | -78.69 | Wt   | A | Ler | 1 | Purugganan                |
| NA | NC:1  | NC-1:19-1 | 1 | 36.02 | -78.69 | Wt   | A | Ler | 1 | Purugganan                |
| NA | NC:1  | NC-1:21-1 | 1 | 36.02 | -78.69 | Wt   | A | Ler | 1 | Purugganan                |
| NA | NC:1  | NC-1:3-1  | 1 | 36.02 | -78.69 | Wt   | A | Ler | 1 | Purugganan                |
| NA | NC:1  | NC-1:5-1  | 1 | 36.02 | -78.69 | Wt   | A | Ler | 1 | Purugganan                |
| NA | NC:1  | NC-1:8-1  | 1 | 36.02 | -78.69 | Wt   | A | Ler | 1 | Purugganan                |
| NA | NY:EF | NY:EF-11  | 1 | 40.91 | -73.15 | Wt   | A | Ler | 1 | Bossdorf (from Bergelson) |
| NA | NY:EF | NY:EF-94  | 1 | 40.91 | -73.15 | Wt   | A | Ler | 1 | Bossdorf (from Bergelson) |
| NA | NY:OF | NY:OF-77  | 1 | 40.78 | -72.91 | Wt   | A | Ler | 1 | Bossdorf (from Bergelson) |
| NA | NY:OF | NY:OF-94  | 1 | 40.78 | -72.91 | Wt   | B | Ler | 1 | Bossdorf (from Bergelson) |
| NA | NY:RR | NY:RR-100 | 1 | 40.94 | -72.86 | Wt   | A | Ler | 1 | Bossdorf (from Bergelson) |

|    |        |            |   |       |        |    |   |     |   |                           |
|----|--------|------------|---|-------|--------|----|---|-----|---|---------------------------|
| NA | NY:RR  | NY:RR-3    | 1 | 40.94 | -72.86 | Wt | A | Ler | 1 | Bossdorf (from Bergelson) |
| NA | NY:RR  | NY:RR-32   | 1 | 40.94 | -72.86 | Wt | A | Ler | 1 | Bossdorf (from Bergelson) |
| NA | NY:SET | NY:SET-18B | 1 | 40.94 | -73.11 | Wt | A | Ler | 1 | Bossdorf (from Bergelson) |
| NA | NY:WP  | NY:WP-51   | 1 | 40.91 | -73.21 | Wt | A | Ler | 1 | Bossdorf (from Bergelson) |
| NA | NY:WP  | NY:WP-94   | 1 | 40.91 | -73.21 | Wt | A | Ler | 1 | Bossdorf (from Bergelson) |
| NA | PA:CF1 | PA:CF1-10  | 1 | 40.33 | -75.05 | Wt | A | Ler | 1 | Stinchcombe               |
| NA | PA:CF1 | PA:CF1-11  | 1 | 40.33 | -75.05 | Wt | A | Ler | 1 | Stinchcombe               |
| NA | PA:CF1 | PA:CF1-12  | 1 | 40.33 | -75.05 | Wt | A | Ler | 1 | Stinchcombe               |
| NA | PA:CF1 | PA:CF1-13  | 1 | 40.33 | -75.05 | Wt | A | Ler | 1 | Stinchcombe               |
| NA | PA:CF1 | PA:CF1-14  | 1 | 40.33 | -75.05 | Wt | A | Ler | 1 | Stinchcombe               |
| NA | PA:CF1 | PA:CF1-15  | 1 | 40.33 | -75.05 | Wt | A | Ler | 1 | Stinchcombe               |
| NA | PA:CF1 | PA:CF1-4   | 1 | 40.33 | -75.05 | Wt | A | Ler | 1 | Stinchcombe               |
| NA | PA:CF1 | PA:CF1-5   | 1 | 40.33 | -75.05 | Wt | A | Ler | 1 | Stinchcombe               |
| NA | PA:CF1 | PA:CF1-6   | 1 | 40.33 | -75.05 | Wt | A | Ler | 1 | Stinchcombe               |
| NA | PA:CF1 | PA:CF1-7   | 1 | 40.33 | -75.05 | Wt | A | Ler | 1 | Stinchcombe               |
| NA | PA:CF1 | PA:CF1-8   | 1 | 40.33 | -75.05 | Wt | A | Ler | 1 | Stinchcombe               |
| NA | PA:CF1 | PA:CF1-9   | 1 | 40.33 | -75.05 | Wt | A | Ler | 1 | Stinchcombe               |
| NA | PA:DT1 | PA:DT1-1   | 1 | 40.30 | -75.14 | Wt | A | Ler | 1 | Stinchcombe               |
| NA | PA:DT1 | PA:DT1-12  | 1 | 40.30 | -75.14 | Wt | A | Ler | 1 | Stinchcombe               |

|    |        |           |   |       |        |      |   |     |   |             |
|----|--------|-----------|---|-------|--------|------|---|-----|---|-------------|
| NA | PA:DT1 | PA:DT1-13 | 1 | 40.30 | -75.14 | null | B | Col | 1 | Stinchcombe |
| NA | PA:DT1 | PA:DT1-14 | 1 | 40.30 | -75.14 | null | B | Ler | 1 | Stinchcombe |
| NA | PA:DT1 | PA:DT1-15 | 1 | 40.30 | -75.14 | Wt   | A | Ler | 1 | Stinchcombe |
| NA | PA:DT1 | PA:DT1-2  | 1 | 40.30 | -75.14 | null | B | Col | 1 | Stinchcombe |
| NA | PA:DT1 | PA:DT1-3  | 1 | 40.30 | -75.14 | Wt   | A | Ler | 1 | Stinchcombe |
| NA | PA:DT1 | PA:DT1-4  | 1 | 40.30 | -75.14 | Wt   | A | Ler | 1 | Stinchcombe |
| NA | PA:DT1 | PA:DT1-5  | 1 | 40.30 | -75.14 | Wt   | A | Ler | 1 | Stinchcombe |
| NA | PA:DT1 | PA:DT1-6  | 1 | 40.30 | -75.14 | Wt   | A | Ler | 1 | Stinchcombe |
| NA | PA:DT1 | PA:DT1-7  | 1 | 40.30 | -75.14 | Wt   | A | Ler | 1 | Stinchcombe |
| NA | PA:DT1 | PA:DT1-8  | 1 | 40.30 | -75.14 | Wt   | A | Ler | 1 | Stinchcombe |
| NA | PA:DT1 | PA:DT1-9  | 1 | 40.30 | -75.14 | Wt   | A | Ler | 1 | Stinchcombe |
| NA | PA:DT2 | PA:DT2-15 | 1 | 40.32 | -75.10 | Wt   | A | Ler | 1 | Stinchcombe |
| NA | PA:DT2 | PA:DT2-8  | 1 | 40.32 | -75.10 | null | A | Col | 1 | Stinchcombe |
| NA | PA:DT4 | PA:DT4-1  | 1 | 40.29 | -75.13 | Wt   | A | Ler | 1 | Stinchcombe |
| NA | PA:DT4 | PA:DT4-11 | 1 | 40.29 | -75.13 | Wt   | A | Ler | 1 | Stinchcombe |
| NA | PA:DT4 | PA:DT4-12 | 1 | 40.29 | -75.13 | Wt   | A | Ler | 1 | Stinchcombe |
| NA | PA:DT4 | PA:DT4-14 | 1 | 40.29 | -75.13 | Wt   | A | Ler | 1 | Stinchcombe |
| NA | PA:DT4 | PA:DT4-3  | 1 | 40.29 | -75.13 | Wt   | A | Ler | 1 | Stinchcombe |
| NA | PA:DT4 | PA:DT4-4  | 1 | 40.29 | -75.13 | Wt   | A | Ler | 1 | Stinchcombe |

|    |      |          |   |       |        |      |   |     |   |               |
|----|------|----------|---|-------|--------|------|---|-----|---|---------------|
| NA | SC:E | SC:E-107 | 1 | 33.38 | -80.30 | Wt   | A | Ler | 1 | Murren/Rutter |
| NA | SC:E | SC:E-113 | 1 | 33.38 | -80.30 | Wt   | A | Ler | 1 | Murren/Rutter |
| NA | SC:E | SC:E-118 | 1 | 33.38 | -80.30 | Wt   | A | Ler | 1 | Murren/Rutter |
| NA | SC:E | SC:E-165 | 1 | 33.38 | -80.30 | Wt   | A | Ler | 1 | Murren/Rutter |
| NA | SC:E | SC:E-17  | 1 | 33.38 | -80.30 | Wt   | A | Ler | 1 | Murren/Rutter |
| NA | SC:E | SC:E-183 | 1 | 33.38 | -80.30 | Wt   | A | Ler | 1 | Murren/Rutter |
| NA | SC:E | SC:E-19  | 1 | 33.38 | -80.30 | Wt   | A | Ler | 1 | Murren/Rutter |
| NA | SC:E | SC:E-196 | 1 | 33.38 | -80.30 | Wt   | A | Ler | 1 | Murren/Rutter |
| NA | SC:E | SC:E-2   | 1 | 33.38 | -80.30 | Wt   | A | Ler | 1 | Murren/Rutter |
| NA | SC:E | SC:E-43  | 1 | 33.38 | -80.30 | Wt   | A | Ler | 1 | Murren/Rutter |
| NA | SC:E | SC:E-45  | 1 | 33.38 | -80.30 | Wt   | A | Ler | 1 | Murren/Rutter |
| NA | SC:E | SC:E-56  | 1 | 33.38 | -80.30 | Wt   | A | Ler | 1 | Murren/Rutter |
| NA | SC:P | SC:P-110 | 1 | 33.70 | -80.03 | Wt   | A | Ler | 1 | Murren/Rutter |
| NA | SC:P | SC:P-121 | 1 | 33.70 | -80.03 | Wt   | A | Ler | 1 | Murren/Rutter |
| NA | SC:P | SC:P-122 | 1 | 33.70 | -80.03 | Wt   | A |     | 0 | Murren/Rutter |
| NA | SC:P | SC:P-172 | 1 | 33.70 | -80.03 | Wt   | A | Ler | 1 | Murren/Rutter |
| NA | SC:P | SC:P-176 | 1 | 33.70 | -80.03 | Wt   | A | Ler | 1 | Murren/Rutter |
| NA | SC:P | SC:P-188 | 1 | 33.70 | -80.03 | Wt   | A | Ler | 1 | Murren/Rutter |
| NA | SC:P | SC:P-197 | 1 | 33.70 | -80.03 | Wt   | A | Ler | 1 | Murren/Rutter |
| NA | SC:P | SC:P-20  | 1 | 33.70 | -80.03 | Wt   | A | Ler | 1 | Murren/Rutter |
| NA | SC:P | SC:P-200 | 1 | 33.70 | -80.03 | Wt   | A | Ler | 1 | Murren/Rutter |
| NA | SC:P | SC:P-34  | 1 | 33.70 | -80.03 | Wt   | A | Ler | 1 | Murren/Rutter |
| NA | SC:P | SC:P-36  | 1 | 33.70 | -80.03 | Wt   | A | Ler | 1 | Murren/Rutter |
| NA | SC:P | SC:P-82  | 1 | 33.70 | -80.03 | Wt   | A | Ler | 1 | Murren/Rutter |
| NA | SC:R | SC:R-100 | 1 | 33.52 | -80.42 | Wt   | A | Ler | 1 | Murren/Rutter |
| NA | SC:R | SC:R-126 | 1 | 33.52 | -80.42 | Wt   | A | Ler | 1 | Murren/Rutter |
| NA | SC:R | SC:R-28  | 1 | 33.52 | -80.42 | Wt   | A | Ler | 1 | Murren/Rutter |
| NA | SC:R | SC:R-29  | 1 | 33.52 | -80.42 | null | A | Col | 1 | Murren/Rutter |
| NA | SC:R | SC:R-33  | 1 | 33.52 | -80.42 |      |   |     | 0 | Murren/Rutter |
| NA | SC:R | SC:R-37  | 1 | 33.52 | -80.42 | Wt   | A | Ler | 1 | Murren/Rutter |
| NA | SC:R | SC:R-42  | 1 | 33.52 | -80.42 | Wt   | A | Ler | 1 | Murren/Rutter |
| NA | SC:R | SC:R-56  | 1 | 33.52 | -80.42 | Wt   | A | Ler | 1 | Murren/Rutter |
| NA | SC:R | SC:R-75  | 1 | 33.52 | -80.42 | Wt   | A | Ler | 1 | Murren/Rutter |
| NA | SC:R | SC:R-83  | 1 | 33.52 | -80.42 | Wt   | A | Ler | 1 | Murren/Rutter |
| NA | SC:R | SC:R-96  | 1 | 33.52 | -80.42 | Wt   | A | Ler | 1 | Murren/Rutter |



|    |    |      |   |       |        |    |   |     |   |                  |
|----|----|------|---|-------|--------|----|---|-----|---|------------------|
| NA | TN | TN17 | 0 | 35.58 | -84.25 | Wt | A | Ler | 1 | Donohue/Borevitz |
| NA | TN | TN33 | 0 | 35.58 | -84.25 | Wt | A | Col | 1 | Donohue/Borevitz |

Supplemental Table 2. Primer descriptions used for genotyping North American *A. thaliana* for variation in three loci previously demonstrated to be associated with flowering time.

| Locus                                                       | Polymorphism                              | Primers                         | Detection method  | Source              |
|-------------------------------------------------------------|-------------------------------------------|---------------------------------|-------------------|---------------------|
| <i>Frigida</i><br>( <i>FRI</i> ) <sup>1</sup>               | 367 bp deletion A                         | FriF, FriSA2                    | Size polymorphism | Caicedo et al. 2004 |
|                                                             | 99 bp deletion B                          | FriSC1, FriSC2                  | Size polymorphism |                     |
|                                                             | 16 bp deletion C                          | FriSB1, FriSB2                  | Size polymorphism |                     |
| <i>Flowering</i><br><i>Locus C</i><br>( <i>FLC</i> )        | Intron SNP<br>( <i>FLC</i> <sup>A</sup> ) | FLCCaps736-F2,<br>FLCCaps736-R2 | dCAPs             | Caicedo et al. 2004 |
|                                                             | Intron SNP<br>( <i>FLC</i> <sup>B</sup> ) | FLCCaps3460-F,<br>FLCCaps3460-R | dCAPs             |                     |
|                                                             | 1,232-bp insertion                        | FLC-Ler-F2,<br>FLC-Ler-R2       | Size polymorphism |                     |
|                                                             | 30-bp insertion                           | FLC-Col-F,<br>FLC-Col-R         | Size polymorphism |                     |
| <i>Phytochrome</i><br><i>C</i> ( <i>PHYC</i> ) <sup>2</sup> | Indel upstream of<br>promoter             | For and Rev                     | Size polymorphism | Samis et al. 2008   |

<sup>1</sup> The lack of a deletion in the *Frigida* locus is interpreted as the wildtype, functional allele.

<sup>2</sup> Indels distinguish between two *Phytochrome C* alleles, *PHYC*<sup>Ler</sup> and *PHYC*<sup>Col</sup>, which are named for their occurrence in the respective lines, Ler and Col.

1 Supplemental Table 3. The frequency of genotypes across three functional loci (n = 213) for lines  
 2 genotyped at all three loci. Polymorphisms at each locus distinguished between two previously  
 3 reported alleles.

|             |     | <i>FRI</i> |   |               |   |
|-------------|-----|------------|---|---------------|---|
|             |     | Wildtype   |   | Null deletion |   |
|             |     | <i>FLC</i> |   | <i>FLC</i>    |   |
|             |     | A          | B | A             | B |
| <i>PHYC</i> | Ler | 180        | 7 | 4             | 6 |
|             | Col | 5          | 0 | 3             | 7 |
